# Supplementary material
Source: publisher figshare collection journal article supplement (https://gsapubs.figshare.com/articles/dataset/_/12348293)
Supplement: Supplementary file 1 [file 1]

# Mechanism of instantaneous coal outbursts—Supplementary materials

GSA Data Repository item 2009229

This supplementary data repository includes the following:

1. Table DR1 lists some deadly coal outbursts in the last 130 years.
2. Experimental apparatus and procedures.
3. Figure DR2 shows six continuous frames of outburst exp 102.
4. Two video clips, one for exp 5 (Figure 1) and one for exp 102 (Figure DR2).

## 1. Table DR1

TABLE DR1. SOME DEADLY COAL OUTBURSTS IN THE LAST 130 YEARS

| Year       | Country | Mine                  | Outburst coal (ton) | Outburst gas (m <sup>3</sup> ) | F               | atalities | Ref. |
|------------|---------|-----------------------|---------------------|--------------------------------|-----------------|-----------|------|
| 1879       | Belgium | Agrappe               | —                   | —                              | —               | 141       | 1    |
| 1930       | Poland  | Wencelaus             | 5000                | 28,000                         | CO <sub>2</sub> | 151       | 1    |
| 1941       | Poland  | Nowa Ruda             | —                   | —                              | —               | 187       | 2    |
| 1958       | Canada  | Springhill            | —                   | —                              | —               | 74        | a    |
| 1960       | China   | Songzao #2, Chongqing | 1000                | —                              | —               | 125       | 3    |
| 1978       | China   | Yaojie #3, Gansu      | 1030                | 240,000                        | CO <sub>2</sub> | 90        | 3    |
| 1981       | Japan   | Yubari-Shin           | 6500                | 600,000                        | CH <sub>4</sub> | 93        | 1    |
| 1985       | China   | Meitian #3, Guangdong | 3200                | 720,000                        | CH <sub>4</sub> | 56        | 3    |
| 1992       | Turkey  | Kozlu                 | —                   | —                              | —               | 263       | 1    |
| 2007.04.19 | China   | Dashucun              | 1200                | —                              | —               | 17        | b    |
| 2007.05.24 | Russia  | Yubileynaya           | —                   | —                              | —               | 35        | c    |
| 2008.05.23 | Ukraine | Donetsk               | —                   | —                              | —               | 8*        | d    |
| 2008.07.31 | China   | Zigui, Hubei          | —                   | —                              | —               | 6         | e    |

References: 1—Beamish and Crosdale, 1998; 2—Lama and Bodziony, 1998; 3—Wang and Li, 2002; a—<http://www.gov.ns.ca/nsarm/virtual/menmines/disasters.asp?Language=English>; b—<http://www.yzsafety.gov.cn/neirong.php?newsid=2229>; c—<http://www.regnum.ru/english/832640.html>; d—<http://mns.gov.ua/daily/showdailyarchive.php?day=1&month=6&year=2008&l=en>; e—[http://news.xinhuanet.com/newscenter/2008-08/04/content\\_8953817.htm](http://news.xinhuanet.com/newscenter/2008-08/04/content_8953817.htm).

\*Three were missing in addition to the eight deaths.

More complete summaries of outburst occurrences can be found in Bodziony and Lama (1996), Beamish and Crosdale (1998), and Wang and Li (2002).

## 2. Experimental Apparatus and Procedures

The apparatus (Fig. DR1) consists of mainly a Lexan (polycarbonate) test cell and a large tank above it. The test cell is 50 mm in diameter and either 400 or 200 mm long. Thin-wall test cells (3 mm thick) were used in earlier experiments and they rupture at ~3.2 MPa. A customer-fabricated thick-wall (10 mm thick) test cell was used in later experiments to reach higher pressures. At 4 MPa, the solubility of CO<sub>2</sub> in coal is ~5 wt% (Cui et al., 2007). This is a very high concentration of gas. (In comparison, for explosive volcanic eruptions, the pre-eruptive H<sub>2</sub>O content in magma is often 4-7 wt%.) The base of the test cell is made of steel. Above the test cell is a large cubic tank (~1 m on each side). Inside the tank, there is an electromagnetically driven knife. The test cell is separated from the large tank by layers of aluminum foil (the number of layers of aluminum foil depends on the test cell pressure), which can be cut by electromagnetically driven knife blades inside the tank.

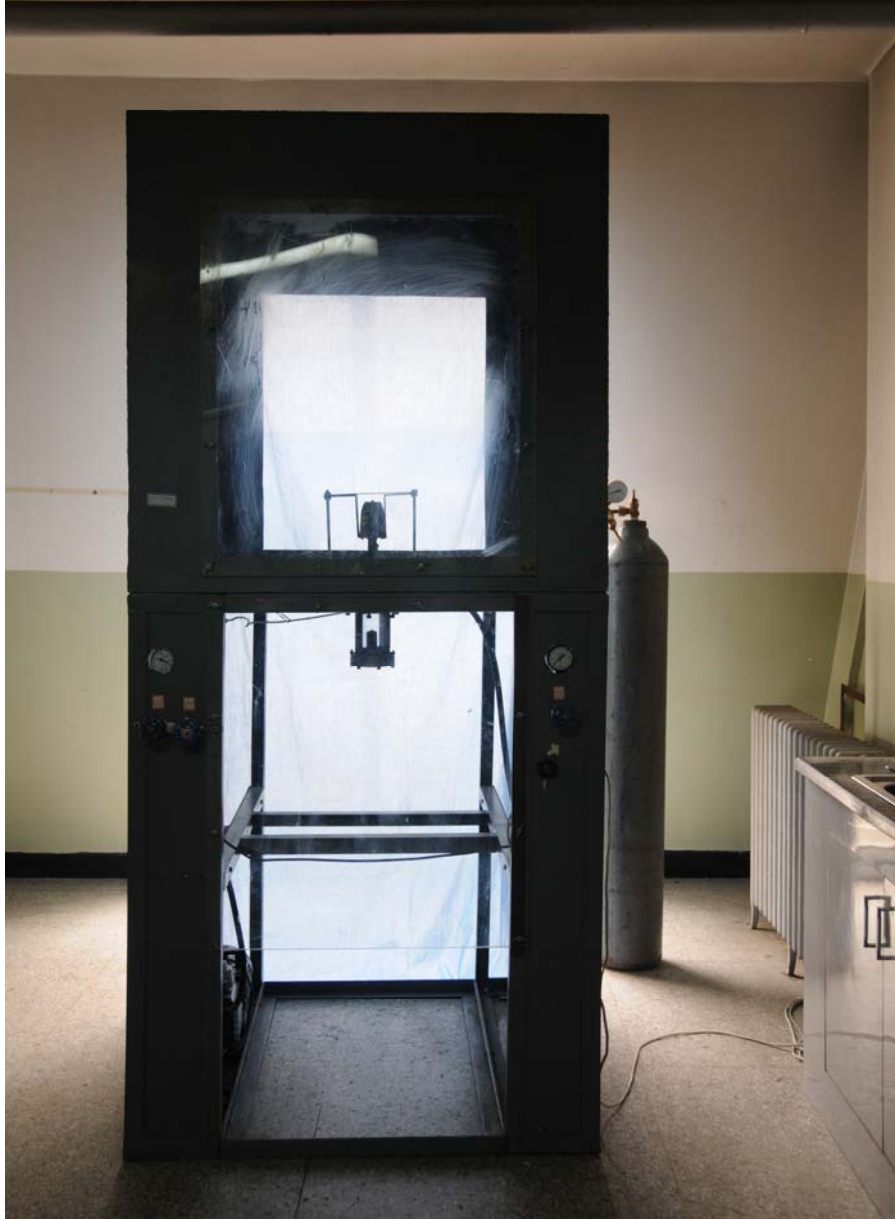

Figure DR1. Experimental apparatus for coal outbursts. A coal cylinder is inside the test cell.

The starting coal samples were large chunks of coal we collected from coal mines. Long cuboids were cut from the chunks and then were ground to quasi-cylinders of 10–20 mm in diameter and ~0.1 m long.

In an experiment, the base of the coal cylinder was glued to the base of the test cell, which was then connected to the large tank. The cell was evacuated to remove air. Then CO<sub>2</sub> was let into the test cell at a desired high pressure (such as 2.5 MPa). The test cell was maintained at high CO<sub>2</sub> pressure for a couple of days to allow CO<sub>2</sub> diffusion into coal and reach rough equilibrium. The duration at high CO<sub>2</sub> pressure was estimated from  $t = r^2/D$  where  $t$  is time,  $r$  is the radius of the coal cylinder and  $D$  is CO<sub>2</sub> diffusivity in coal (Saghafi et al., 2007). To achieve sudden decompression, the knife in the tank was triggered to come down to cut open the

aluminum foil. The high gas pressure in the test cell then completely opened the aluminum foil, leading to a loud noise similar to gunshot sound. (Sometimes, only a tiny hole was open in the aluminum foil, leading to slow decompression. These experiments were not counted.) Most experiments were recorded by a video camera. Observation was made on whether the coal sample stayed as one piece or fragmented into pieces.

### 3. Video Frames for Experiment 102

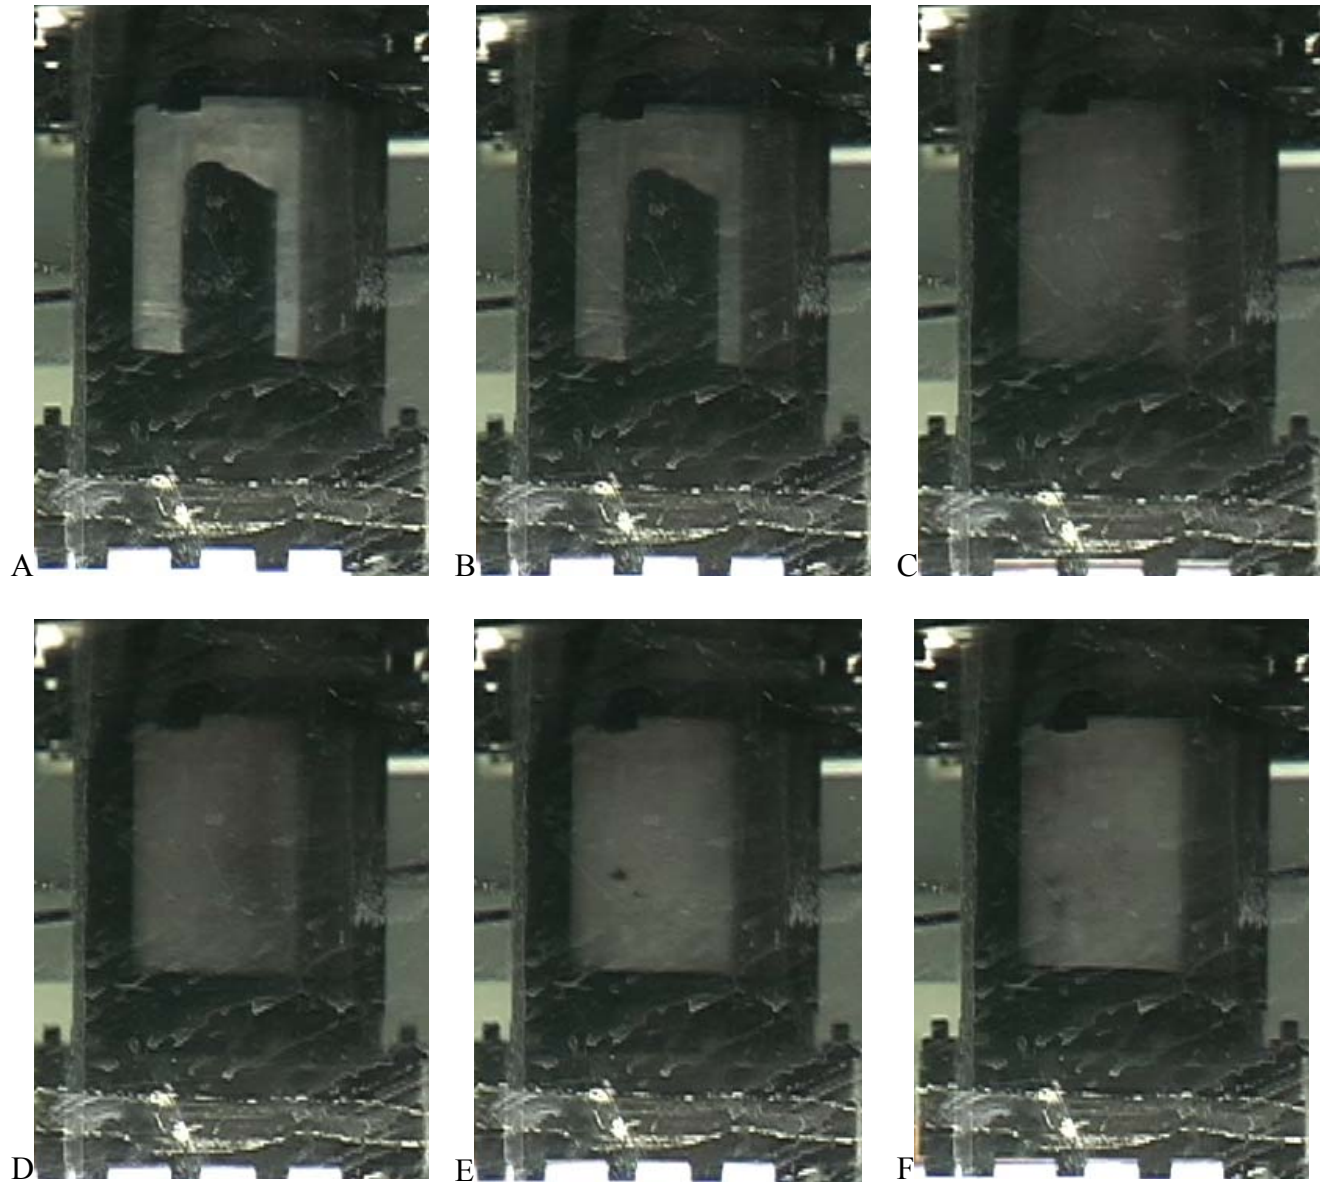

Figure DR2. Six continuous frames of video camera recording (representing 0.2 s) of a sudden decompression experiment 102. Coal fragmentation occurred between frame B and C (that is, in less than 0.033 s). Before sudden decompression shown in this figure, the coal sample was pressurized in  $\text{CO}_2$  at 4.0 MPa for 2.9 days. After the experiment, degree of fragmentation is 72.6%. The QuickTime movie can be seen by clicking the link Experiment 102 below.

#### **4. Video Clips for two Experiments**

[Video DR1: Experiment 5](#)

[Video DR2: Experiment 102](#)

#### **References Cited in This Supplement:**

- Cui, X., Bustin, R.M., and Chikatamarla, L., 2007, Adsorption-induced coal swelling and stress: implications for methane production and acid gas sequestration into coal seams: J. Geophys. Res., v. 112, p. doi: 10.1029/2004JB003482.
- Saghafi, A., Faiz, M., and Roberts, D., 2007, CO<sub>2</sub> storage and gas diffusivity properties of coals from Sydney Basin, Australia: International Journal of Coal Geology, v. 70, p. 240–254, doi: 10.1016/j.coal.2006.03.006.
- Wang, J.F., and Li, W.J., 2002, Collection of Reports and Comments on Coal Mine Accidents in China: Beijing, Coal Industry Press (in Chinese), 3032 p.
